# Supplementary material for: Inhibition of interleukin-1β reduces myelofibrosis and osteosclerosis in mice with JAK2-V617F driven myeloproliferative neoplasm
Source: PubMed Central journal article supplement (PMC9470591; doi:10.1038/s41467-022-32927-4), 2022-09-13
Supplement: 41467_2022_32927_MOESM3_ESM.pdf [file 41467_2022_32927_MOESM3_ESM.pdf]

Supplementary Data 1: Information on diagnosis, progression, and gene mutations of MPN patients described in Figures 1 and Supplementary Figures 1-3
